# Supplementary material for: Validation of the Diet Quality Questionnaire in Chinese Children and Adolescents and Relationship with Pediatric Overweight and Obesity
Source: MDPI journal article supplement (doi:10.3390/nu14173551), 2022-08-29
Supplement: s1 [file s1]

# Supplementary Materials

**Table S1.** Global Dietary Recommendations scores constructed from the Diet Quality Questionnaire.

| Food Groups                               | GDR-Healthy<br>(0 to 9) | GDR-Limit<br>(0 to 9) | Overall GDR <sup>a</sup><br>(-9 to 9) |
|-------------------------------------------|-------------------------|-----------------------|---------------------------------------|
| 1. Staple foods made from grains          |                         |                       |                                       |
| 2. Whole grain                            | √                       |                       | √                                     |
| 3. White root/tubers                      |                         |                       |                                       |
| 4. Legumes                                | √                       |                       | √                                     |
| 5. Vitamin A-rich orange vegetables       | √                       |                       | √                                     |
| 6. Dark green leafy vegetables            | √                       |                       | √                                     |
| 7. Other vegetables                       | √                       |                       | √                                     |
| 8. Vitamin A-rich fruits                  | √                       |                       | √                                     |
| 9. Citrus                                 | √                       |                       | √                                     |
| 10. Other fruits                          | √                       |                       | √                                     |
| 11. Grain-baked sweets                    |                         | √                     | √                                     |
| 12. Other sweets                          |                         | √                     | √                                     |
| 13. Eggs                                  |                         |                       |                                       |
| 14. Cheese                                |                         |                       |                                       |
| 15. Yogurt                                |                         |                       |                                       |
| 16. Processed meat <sup>b</sup>           |                         | √                     | √                                     |
| 17. Unprocessed red meat (ruminant)       |                         | √                     | √                                     |
| 18. Unprocessed red meat (non-ruminant)   |                         | √                     | √                                     |
| 19. Poultry                               |                         |                       |                                       |
| 20. Fish and seafood                      |                         |                       |                                       |
| 21. Nuts and seeds                        | √                       |                       | √                                     |
| 22. Packaged ultra-processed salty snacks |                         | √                     | √                                     |
| 23. Instant noodles                       |                         | √                     | √                                     |
| 24. Deep fried foods                      |                         | √                     | √                                     |
| 25. Fluid milk                            |                         |                       |                                       |
| 26. Sweet tea/coffee/milk drinks          |                         |                       |                                       |
| 27. Fruit juice                           |                         |                       |                                       |
| 28. Sugar-sweetened beverages             |                         | √                     | √                                     |
| 29. Fast food                             |                         | √                     | √                                     |

GDR, Global Dietary Recommendations. “√” represents the selected food groups used to construct the GDR scores. <sup>a</sup> The overall GDR score is calculated as GDR-Healthy score subtracting GDR-Limit score. <sup>b</sup> Processed meat is double weighted.





**Table S3.** Number and percentage (%) of the overweight and obese children by the Global Dietary Recommendations (GDR) scores.

| Scores      | Body mass index        |       |            |      |                 |      | Waist circumference |       |                   |      |
|-------------|------------------------|-------|------------|------|-----------------|------|---------------------|-------|-------------------|------|
|             | Non-overweight/obesity |       | Overweight |      | General obesity |      | Non-obesity         |       | Abdominal obesity |      |
|             | <i>n</i>               | %     | <i>n</i>   | %    | <i>n</i>        | %    | <i>n</i>            | %     | <i>n</i>          | %    |
| GDR-Healthy |                        |       |            |      |                 |      |                     |       |                   |      |
| 0           | 16                     | 76.2  | 3          | 14.3 | 2               | 9.5  | 17                  | 81.0  | 4                 | 19.0 |
| 1           | 198                    | 84.6  | 14         | 6.0  | 22              | 9.4  | 192                 | 82.8  | 40                | 17.2 |
| 2           | 363                    | 78.2  | 57         | 12.3 | 44              | 9.5  | 373                 | 80.2  | 92                | 19.8 |
| 3           | 324                    | 77.5  | 48         | 11.5 | 46              | 11.0 | 329                 | 79.5  | 85                | 20.5 |
| 4           | 180                    | 77.3  | 29         | 12.4 | 24              | 10.3 | 178                 | 76.1  | 56                | 23.9 |
| 5           | 36                     | 81.8  | 4          | 9.1  | 4               | 9.1  | 39                  | 88.6  | 5                 | 11.4 |
| 6           | 7                      | 100.0 | 0          | 0.0  | 0               | 0.0  | 5                   | 71.4  | 2                 | 28.6 |
| 7           | 1                      | 50.0  | 1          | 50.0 | 0               | 0.0  | 1                   | 50.0  | 1                 | 50.0 |
| GDR-Limit   |                        |       |            |      |                 |      |                     |       |                   |      |
| 0           | 306                    | 86.2  | 27         | 7.6  | 22              | 6.2  | 301                 | 85.0  | 53                | 15.0 |
| 1           | 555                    | 78.2  | 95         | 13.4 | 60              | 8.5  | 565                 | 80.0  | 141               | 20.0 |
| 2           | 205                    | 74.5  | 25         | 9.1  | 45              | 16.4 | 212                 | 76.8  | 64                | 23.2 |
| 3           | 45                     | 68.2  | 7          | 10.6 | 14              | 21.2 | 42                  | 63.6  | 24                | 36.4 |
| 4           | 11                     | 78.6  | 2          | 14.3 | 1               | 7.1  | 11                  | 78.6  | 3                 | 21.4 |
| 5           | 3                      | 100.0 | 0          | 0.0  | 0               | 0.0  | 3                   | 100.0 | 0                 | 0.0  |
| Overall GDR |                        |       |            |      |                 |      |                     |       |                   |      |
| -3          | 100                    | 100.0 | 0          | 0.0  | 0               | 0.0  | 1                   | 100.0 | 0                 | 0.0  |
| -2          | 80                     | 80.0  | 2          | 6.7  | 4               | 13.3 | 22                  | 73.3  | 8                 | 26.7 |
| -1          | 42                     | 71.2  | 6          | 10.2 | 11              | 18.6 | 42                  | 71.2  | 17                | 28.8 |
| 0           | 157                    | 77.0  | 17         | 8.3  | 30              | 14.7 | 156                 | 76.9  | 47                | 23.2 |
| 1           | 340                    | 80.4  | 49         | 11.6 | 34              | 8.0  | 354                 | 83.7  | 69                | 16.3 |
| 2           | 325                    | 77.8  | 53         | 12.7 | 40              | 9.6  | 327                 | 78.8  | 88                | 21.2 |
| 3           | 170                    | 80.6  | 22         | 10.4 | 19              | 9.0  | 165                 | 78.2  | 46                | 21.8 |
| 4           | 53                     | 84.1  | 6          | 9.5  | 4               | 6.4  | 55                  | 87.3  | 8                 | 12.7 |
| 5           | 11                     | 100.0 | 0          | 0.0  | 0               | 0.0  | 11                  | 100.0 | 0                 | 0.0  |
| 6           | 2                      | 66.7  | 1          | 33.3 | 0               | 0.0  | 1                   | 33.3  | 2                 | 66.7 |

**Table S4.** Subgroup analysis of associations between the Global Dietary Recommendations scores and overweight and obesity by sex, age, and residence.

| Scores      | Overweight       |                | General obesity  |                | Abdominal obesity |                |
|-------------|------------------|----------------|------------------|----------------|-------------------|----------------|
|             | OR (95% CI)      | <i>p</i> Value | OR (95% CI)      | <i>p</i> Value | OR (95% CI)       | <i>p</i> Value |
| Boys        |                  |                |                  |                |                   |                |
| GDR-Healthy | 1.04 (0.85-1.26) | 0.731          | 0.92 (0.74-1.15) | 0.476          | 1.04 (0.88-1.23)  | 0.655          |
| GDR-Limit   | 0.97 (0.75-1.27) | 0.843          | 1.18 (0.90-1.55) | 0.230          | 1.13 (0.90-1.40)  | 0.295          |
| Overall GDR | 1.04 (0.88-1.22) | 0.674          | 0.88 (0.73-1.06) | 0.172          | 0.98 (0.85-1.13)  | 0.771          |
| Girl        |                  |                |                  |                |                   |                |
| GDR-Healthy | 1.12 (0.88-1.43) | 0.367          | 1.05 (0.83-1.33) | 0.692          | 1.02 (0.86-1.20)  | 0.824          |
| GDR-Limit   | 1.11 (0.79-1.57) | 0.536          | 1.82 (1.36-2.45) | <0.001         | 1.33 (1.07-1.66)  | 0.010          |
| Overall GDR | 1.04 (0.85-1.27) | 0.702          | 0.82 (0.67-0.99) | 0.037          | 0.91 (0.80-1.04)  | 0.177          |
| 7–12 years  |                  |                |                  |                |                   |                |
| GDR-Healthy | 1.01 (0.82-1.24) | 0.936          | 0.92 (0.77-1.11) | 0.400          | 0.98 (0.83-1.16)  | 0.852          |
| GDR-Limit   | 1.03 (0.78-1.36) | 0.838          | 1.40 (1.12-1.75) | 0.004          | 1.29 (1.04-1.59)  | 0.019          |
| Overall GDR | 1.00 (0.84-1.18) | 0.954          | 0.82 (0.71-0.96) | 0.011          | 0.89 (0.78-1.02)  | 0.106          |
| 13–18 years |                  |                |                  |                |                   |                |
| GDR-Healthy | 1.15 (0.92-1.44) | 0.225          | 1.17 (0.84-1.63) | 0.353          | 1.07 (0.91-1.27)  | 0.404          |
| GDR-Limit   | 1.04 (0.75-1.43) | 0.825          | 1.63 (1.07-2.49) | 0.023          | 1.17 (0.93-1.48)  | 0.189          |
| Overall GDR | 1.09 (0.90-1.33) | 0.367          | 0.92 (0.69-1.22) | 0.542          | 0.99 (0.86-1.15)  | 0.932          |
| Rural       |                  |                |                  |                |                   |                |
| GDR-Healthy | 1.08 (0.88-1.34) | 0.445          | 0.92 (0.73-1.16) | 0.472          | 0.91 (0.76-1.08)  | 0.262          |
| GDR-Limit   | 1.32 (0.99-1.76) | 0.061          | 1.47 (1.11-1.94) | 0.007          | 1.26 (1.00-1.57)  | 0.047          |
| Overall GDR | 0.93 (0.77-1.13) | 0.456          | 0.88 (0.72-1.06) | 0.174          | 0.85 (0.73-0.98)  | 0.028          |
| Urban       |                  |                |                  |                |                   |                |
| GDR-Healthy | 1.06 (0.85-1.32) | 0.628          | 1.05 (0.84-1.33) | 0.655          | 1.16 (0.99-1.36)  | 0.076          |
| GDR-Limit   | 0.83 (0.62-1.12) | 0.228          | 1.37 (1.03-1.83) | 0.031          | 1.19 (0.96-1.47)  | 0.123          |
| Overall GDR | 1.13 (0.95-1.35) | 0.166          | 0.83 (0.69-1.01) | 0.057          | 1.04 (0.91-1.19)  | 0.591          |

CI, confidence interval; GDR, global dietary recommendations; OR, odds ratio. Logistic regression analyses are used to calculate the odds ratios and 95% confidence intervals with adjustment for sex, age, residence, and urbanization index, except in specific subgroups.

**Table S5.** Sensitivity analysis of associations between the Global Dietary Recommendations scores and overweight and obesity.

| Scores      | Overweight       |                | General obesity  |                | Abdominal obesity |                |
|-------------|------------------|----------------|------------------|----------------|-------------------|----------------|
|             | OR (95% CI)      | <i>p</i> Value | OR (95% CI)      | <i>p</i> Value | OR (95% CI)       | <i>p</i> Value |
| GDR-Healthy |                  |                |                  |                |                   |                |
| Continuous  | 1.08 (0.94-1.25) | 0.260          | 0.96 (0.80-1.14) | 0.626          | 0.99 (0.89-1.11)  | 0.873          |
| Categories  |                  |                |                  |                |                   |                |
| ≤1          | 1.00 (Ref.)      |                | 1.00 (Ref.)      |                | 1.00 (Ref.)       |                |
| 2           | 1.52 (0.92-2.51) | 0.104          | 1.05 (0.60-1.86) | 0.862          | 1.20 (0.82-1.75)  | 0.356          |
| ≥3          | 1.51 (0.93-2.45) | 0.092          | 1.00 (0.58-1.72) | 0.998          | 1.12 (0.78-1.62)  | 0.535          |
| GDR-Limit   |                  |                |                  |                |                   |                |
| Continuous  | 1.08 (0.90-1.31) | 0.401          | 1.29 (1.05-1.60) | 0.018          | 1.11 (0.95-1.28)  | 0.193          |
| Categories  |                  |                |                  |                |                   |                |
| 0           | 1.00 (Ref.)      |                | 1.00 (Ref.)      |                | 1.00 (Ref.)       |                |
| 1           | 1.48 (0.97-2.25) | 0.072          | 1.25 (0.72-2.16) | 0.431          | 1.14 (0.81-1.60)  | 0.445          |
| ≥2          | 1.31 (0.80-2.16) | 0.279          | 1.99 (1.11-3.57) | 0.021          | 1.31 (0.89-1.91)  | 0.172          |
| Overall GDR |                  |                |                  |                |                   |                |
| Continuous  | 1.03 (0.91-1.15) | 0.668          | 0.87 (0.76-1.01) | 0.061          | 0.96 (0.87-1.05)  | 0.349          |
| Categories  |                  |                |                  |                |                   |                |
| <0          | 1.00 (Ref.)      |                | 1.00 (Ref.)      |                | 1.00 (Ref.)       |                |
| 0           | 1.09 (0.50-2.41) | 0.825          | 0.81 (0.38-1.74) | 0.588          | 0.93 (0.53-1.63)  | 0.794          |
| ≥1          | 1.18 (0.59-2.36) | 0.637          | 0.57 (0.29-1.09) | 0.089          | 0.73 (0.45-1.19)  | 0.211          |

CI, confidence interval; GDR, global dietary recommendations; OR, odds ratio; Ref, reference group. Logistic regression analyses are used to calculate the odds ratios and 95% confidence intervals with adjustment for sex, age, residence, and urbanization index. Overweight and general obesity are defined using the World Health Organization body mass index for age z-scores; Abdominal obesity is defined using the international waist circumference percentile cutoffs for central obesity in children and adolescents aged 6–18 years.
